# Supplementary material for: The Transcription Factor SUB1 Is a Master Regulator of the Macrophage TLR Response in Atherosclerosis
Source: PubMed Central journal article supplement (PMC8498911; doi:10.1002/advs.202004162), 2021-08-10

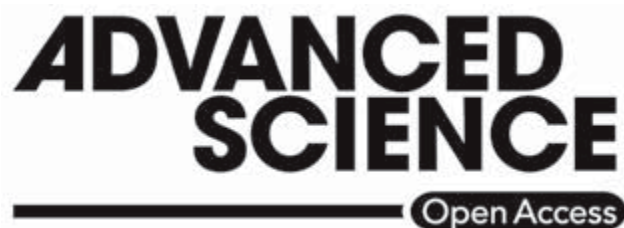

## Supporting Information

for *Adv. Sci.*, DOI: 10.1002/adv.202004162

### The Transcription Factor *SUB1* is a Master Regulator of Macrophage TLR Response in Atherosclerosis

*Rongzhong Huang PhD, Zicheng Hu PhD, Xiaorui Chen MD, Yu Cao PhD, Hongrong Li MD, Hong Zhang MD, Yongyong Li PhD, Liwen Liang MD, Yuxing Feng MD, Ying Wang PhD, Wenhua Su MD, Zerui Kong MD, N.D. Melgiri MD, Lihong Jiang PhD, Xingsheng Li PhD, Jianlin Du PhD\**, and *Yunqing Chen PhD\**

## Supporting Information

**The Transcription Factor *SUB1* is a Master Regulator of Macrophage TLR Response in Atherosclerosis**

Rongzhong Huang PhD<sup>1</sup>, Jianlin Du PhD<sup>2\*</sup>, Zicheng Hu PhD<sup>3</sup>, Xiaorui Chen MD<sup>4</sup>, Yu Cao PhD<sup>5</sup>, Hongrong Li MD<sup>5</sup>, Hong Zhang MD<sup>6</sup>, Yongyong Li PhD<sup>1</sup>, Liwen Liang MD<sup>6</sup>, Yuxing Feng MD<sup>7</sup>, Ying Wang PhD<sup>8</sup>, Wenhua Su MD<sup>6</sup>, Zerui Kong MD<sup>9,10</sup>, N.D. Melgiri MD<sup>11</sup>, Lihong Jiang PhD<sup>5</sup>, Xingsheng Li PhD<sup>1</sup>, Yunqing Chen PhD<sup>2\*</sup>

**SUPPORTING FILES**

**Software S1.** All R codes are provided in a compressed ZIP file located at the following URL:

[https://drive.google.com/file/d/1TjB82\\_bbUTOMcYC-wGk4EpGy094DUfUO/view?](https://drive.google.com/file/d/1TjB82_bbUTOMcYC-wGk4EpGy094DUfUO/view?usp=sharing)

usp=sharing. This ZIP file contains all R code necessary to replicate the study's analysis as described in the Methods: (i) extraction of TLR transcription signatures for TLR2 and TLR4 from whole transcriptome data, and (ii) determination of master regulator TFs from the two TLR signatures.

**File S1.** Gene expression profiles of Pam- and LPS-treated versus non-treated BMDMs.

Microarray data for Pam-treated (TLR2) and LPS-treated (TLR4) versus non-treated BMDMs.

**File S2.** Summary statistics for the six co-expression networks. Six co-expression networks were generated from the six transcriptomic datasets derived from human carotid plaques and normal carotid tissue samples (n=371).

**File S3.** Gene set enrichment analysis (GSEA) of the gene communities within TLR networks.

GSEA was applied to the fastgreedy.community-identified gene communities within the TLR2 gene network (n=7 communities) and TLR4 gene network (n=7 communities). Gene Ontology (GO) annotation for Molecular Function (MF) and Biological Processes (BP) and KEGG pathway for significantly enriched terms and pathways by both GSEA and hypergeometric analysis by HTSanalyzeR

([www.bioconductor.org/packages/release/bioc/html/HTSanalyzeR.html](http://www.bioconductor.org/packages/release/bioc/html/HTSanalyzeR.html)).

**SUPPORTING TABLES**

**Table S1.** qPCR or ChIP analysis primer sequences.

| Gene name                       | Forward primer                 | Reverse primer             |
|---------------------------------|--------------------------------|----------------------------|
| <i>Arg1</i>                     | GGGAAAGCCAATGAAGAGCTG          | AGAAAGGACACAGGTTGC         |
| <i>Ccl2</i>                     | CACTCACCTGCTGCTACTCATT<br>C    | TCTTTGGGACACCTGCTG         |
| <i>CD206</i>                    | CCCAAGGGCTCTTCTAAAGCA          | CGGCACCTATCACA             |
| <i>Gapdh</i>                    | TCTCCTGCGACTTCAACAGC           | TCCAGGGTTTCTTACTTC         |
| <i>iNOS</i>                     | AGCCCTCACCTACTTCCTG            | TCTCTGCCTATCCGTCTC         |
| <i>Il-1<math>\beta</math></i>   | GCTTCAGGCAGGCAGTATC            | ATGGGCTCTTCTTCAAAG         |
| <i>Irf1</i>                     | TTGCGCCACTTCTCTTAAC            | TCCAATCCAGTCTATGTCC<br>C   |
| <i>Mgl1</i>                     | TGAGAAAGGCTTTAAGAAGCTG<br>GGGA | CACCTGTAGTGATGTGGG         |
| <i>Retnlb</i>                   | TCCAGCTAACTATCCCTCCACT<br>GGTG | CCATCTGTTCATAGTCTTG<br>A   |
| <i>Sub1</i>                     | TTCCAGAGAAGCCCGTGAAG           | AAGTCCCGAACACTGACA<br>TATC |
| <i>Tnfa</i>                     | GTTTCTGTCCCTTTCCTCAC           | CTCTTCTGCCAGTTCC           |
| <i>Cre</i>                      | CCCAGAAATGCCAGATTACG           | CTTGGGCTGCCAGAATTTTC<br>TC |
| <i>IRF1</i> promoter<br>(human) | GGGACAAGGCGGAGTGAGAG<br>G      | AGCGGCGAAGGGGAAGTA<br>CAG  |

## SUPPORTING FIGURES

**Figure S1.** Transcriptomic dataset quality control analysis. Quality control (QC) analysis of patient-derived carotid specimen transcriptomic datasets using normalized unscaled standard errors (NUSE) and relative log expression (RLE) values.

**Figure S2.** Transcriptomic dataset normalization. Pre- and post-robust multi-array averaging (RMA) normalization of microarray probe intensity values from patient-derived carotid specimen transcriptomic datasets.

**Figure S3.** Schematic of transgenic mouse model construction. Upstream of *Sub1* promoter and downstream of 3'UTR, LoxP sites were inserted in the DNA fragments. For selection of recombinants *Frt* sites flanked by PGK neo cassette was used. Lysozyme promoter driven by Cre recombinase (*LysM<sup>Cre</sup>*) was used to delete the entire *Sub1* fragment.

**Figure S4.** Body weights and serum lipid profiling of chow-fed *ApoE*<sup>-/-</sup> mice cohorts in TLR inhibition experiments. *ApoE*<sup>-/-</sup>; *Sub1*<sup>flox/flox</sup> (*ApoE*<sup>-/-</sup> WT) mice were fed a chow diet and administered vehicle (Ctrl), C29 (50 mg/kg), or TAK-242 (3 mg/kg) by daily intraperitoneal (i.p.) injection for 14 weeks. (A) Body weights, (B) serum total cholesterol, (C) serum low-density lipoprotein cholesterol (LDL-C), (D) serum high-density lipoprotein cholesterol (HDL-C), and (E) serum triglycerides. Data reported as means ± SDs. *n*=9 mice per group. \**P*<0.05, \*\**P*<0.01 [one-way ANOVA with Fisher's LSD].

**Figure S5.** Body weights and serum lipid profiling of chow-fed *ApoE*<sup>-/-</sup> mice cohorts in TLR agonism experiments. *ApoE*<sup>-/-</sup>; *Sub1*<sup>flox/flox</sup> (*ApoE*<sup>-/-</sup> WT), *ApoE*<sup>-/-</sup>; *LysM*<sup>Cre/-</sup>/*Sub1*<sup>flox/wt</sup> (*ApoE*<sup>-/-</sup> HEMI), and *ApoE*<sup>-/-</sup>; *LysM*<sup>Cre/-</sup>/*Sub1*<sup>flox/flox</sup> (*ApoE*, *Sub1* KO) mice were fed a chow diet and administered vehicle (Ctrl), Pam (15 µg), or LPS (50 µg) by weekly intraperitoneal (i.p.) injection for 14 weeks. (A) Body weights, (B) serum total cholesterol, (C) serum low-density lipoprotein cholesterol (LDL-C), (D) serum high-density lipoprotein cholesterol (HDL-C), and (E) serum triglycerides. Data reported as means ± SDs. *n*=9 mice per group. \**P*<0.05, \*\**P*<0.01 [two-way ANOVA with Fisher's LSD].

**Figure S6.** Body weights and serum lipid profiling of HFD-fed mice. *Sub1*<sup>flox/flox</sup> (wild-type, WT), *LysM*<sup>Cre/-</sup>/*Sub1*<sup>flox/wt</sup> (hemizygous, HEMI), and *LysM*<sup>Cre/-</sup>/*Sub1*<sup>flox/flox</sup> (knockout, KO) mice were fed a standard chow or HFD for 20 weeks. (A) Body weights, (B) serum total cholesterol, (C) serum low-density lipoprotein cholesterol (LDL-C), (D) serum high-density lipoprotein cholesterol (HDL-C), and (E) serum triglycerides. Data reported as means ± SDs. *n*=9 mice per group. \**P*<0.05, \*\**P*<0.01 [two-way ANOVA with Fisher's LSD].

**Figure S7.** Validation of *Sub1* and *Stat6* knockdown in *Sub1* KO or *Stat6* KO bone marrow. Immunoblotting of *Sub1* and *Stat6* in bone marrow samples from *Sub1*<sup>flox/flox</sup> mice (WT->*Ldlr*<sup>-/-</sup>), *LysM*<sup>Cre/-</sup>/*Sub1*<sup>flox/wt</sup> mice (HEMI->*Ldlr*<sup>-/-</sup>), *LysM*<sup>Cre/-</sup>/*Sub1*<sup>flox/flox</sup> mice (*Sub1* KO->*Ldlr*<sup>-/-</sup>), or *LysM*<sup>Cre/-</sup>/*Sub1*<sup>flox/flox</sup>; *Stat6*<sup>-/-</sup> mice (*Sub1*, *Stat6* KO->*Ldlr*<sup>-/-</sup>) prior to transplantation into irradiated *Ldlr*<sup>-/-</sup> mice.

**Figure S8.** Body weights and serum lipid profiling of Western diet-fed *Ldlr*<sup>-/-</sup> recipient mice. Irradiated *Ldlr*<sup>-/-</sup> mice transplanted with bone marrow from *Sub1*<sup>flox/flox</sup> mice (WT->*Ldlr*<sup>-/-</sup>), *LysM*<sup>Cre/-</sup>/*Sub1*<sup>flox/wt</sup> mice (HEMI->*Ldlr*<sup>-/-</sup>), *LysM*<sup>Cre/-</sup>/*Sub1*<sup>flox/flox</sup> mice (*Sub1* KO->*Ldlr*<sup>-/-</sup>), or *LysM*<sup>Cre/-</sup>/*Sub1*<sup>flox/flox</sup>; *Stat6*<sup>-/-</sup> mice (*Sub1*, *Stat6* KO->*Ldlr*<sup>-/-</sup>) were fed a Western diet for 12 weeks. **(A)** Body weights, **(B)** serum total cholesterol, **(C)** serum low-density lipoprotein cholesterol (LDL-C), **(D)** serum high-density lipoprotein cholesterol (HDL-C), and **(E)** serum triglycerides. Data reported as means ± SDs. *n*=9 mice per group. \**P*<0.05, \*\**P*<0.01 [one-way ANOVA with Fisher's LSD].

**Figure S9.** Transplantation of *Sub1* KO bone marrow does not significantly impact myocardia of Western diet-fed *Ldlr*<sup>-/-</sup> recipient mice. *Ldlr*<sup>-/-</sup> mice transplanted with bone marrow from *Sub1*<sup>flox/flox</sup> mice (WT->*Ldlr*<sup>-/-</sup>), *LysM*<sup>Cre/-</sup>/*Sub1*<sup>flox/wt</sup> mice (HEMI->*Ldlr*<sup>-/-</sup>), *LysM*<sup>Cre/-</sup>/*Sub1*<sup>flox/flox</sup> mice (*Sub1* KO->*Ldlr*<sup>-/-</sup>), or *LysM*<sup>Cre/-</sup>/*Sub1*<sup>flox/flox</sup>; *Stat6*<sup>-/-</sup> mice (*Sub1*, *Stat6* KO->*Ldlr*<sup>-/-</sup>) were fed a Western diet for 12 weeks. No discernable evidence of **(A)** hypertrophy in interventricular septa (scale bar=1 mm), **(B)** calcification of aortic valves by Alizarin Red (scale bar=100 μm), or **(C)** macrophage infiltration by CD68+ immunofluorescence (red) on a cardiomyocyte α-actinin+ immunofluorescence (green) background in the four mouse cohorts (scale bar=100 μm). Data reported as means ± SDs. *n*=9 mice per group. \**P*<0.05, \*\**P*<0.01 [one-way ANOVA with Fisher's LSD].

**Figure S10.** Assessment of *Irf1* mRNA expression in isolated aortic root plaque macrophages. qPCR quantification of *Irf1* mRNA expression in aortic root plaque macrophages isolated from **(A)** *ApoE*<sup>-/-</sup>; *Sub1*<sup>flox/flox</sup> (*ApoE*<sup>-/-</sup> WT) mice fed a chow diet and administered (Ctrl), C29 (50 mg/kg), or TAK-242 (3 mg/kg) by daily intraperitoneal (i.p.) injection for 14 weeks, **(B)** *ApoE*<sup>-/-</sup> WT, *ApoE*<sup>-/-</sup>; *LysM*<sup>Cre/-</sup>/*Sub1*<sup>flox/wt</sup> mice (*ApoE*<sup>-/-</sup> HEMI), and *ApoE*<sup>-/-</sup>; *LysM*<sup>Cre/-</sup>/*Sub1*<sup>flox/flox</sup> mice (*ApoE*, *Sub1* KO) fed a chow diet and administered vehicle (Ctrl), Pam (15 μg), or LPS (50 μg) by weekly intraperitoneal (i.p.) injection for 14 weeks, and **(C)** *Ldlr*<sup>-/-</sup> mice transplanted with bone marrow from *Sub1*<sup>flox/flox</sup> mice (WT-

$>Ldlr^{-/-}$ ),  $LysM^{Cre/-}/Sub1^{flox/wt}$  mice (HEMI- $>Ldlr^{-/-}$ ),  $LysM^{Cre/-}/Sub1^{flox/flox}$  mice ( $Sub1$  KO- $>Ldlr^{-/-}$ ), or  $LysM^{Cre/-}/Sub1^{flox/flox}$ ;  $Stat6^{-/-}$  mice ( $Sub1$ ,  $Stat6$  KO- $>Ldlr^{-/-}$ ) fed a Western diet for 12 weeks. Data reported as means  $\pm$  SDs.  $n=9$  mice per group. \* $P<0.05$ , \*\* $P<0.01$  [(A, C) one-way ANOVA with Fisher's LSD; (B) two-way ANOVA with Fisher's LSD].

**Figure S11.** Improved cholesterol transport in  $Sub1$  KO macrophages abrogated by  $Irf1$  overexpression. The following experiments employed  $Sub1^{flox/flox}$  (wild-type, WT),  $LysM^{Cre/-}/Sub1^{flox/wt}$  (hemizygous, HEMI), and  $LysM^{Cre/-}/Sub1^{flox/flox}$  (knockout, KO) bone marrow-derived macrophages (BMDMs). BMDMs were transfected with Lenti-GIII-CMV- $Irf1$ -HA (LV- $Irf1$ ) to enable stable  $Irf1$  overexpression or the matching vector control. (A) Cholesterol uptake in BMDMs exposed to [ $^3$ H] cholesterol-labeled acLDL (50  $\mu$ g/ml) for 30 min. All values normalized to total protein levels and expressed as fold of WT, LV-Ctrl. (B) Cholesterol efflux from BMDMs treated with [ $^3$ H] cholesterol for 48 h. (C) Western blotting of  $Abca1$ ,  $Abcg1$ , and  $Olr1$  in BMDMs following exposure to vehicle (Ctrl) or acLDL (50  $\mu$ g/ml, 24 h). Data reported as means  $\pm$  SDs.  $n=3$  biological replicates  $\times$  3 technical replicates. \* $P<0.05$ , \*\* $P<0.01$  [two-way ANOVA with Fisher's LSD; comparing  $n=3$  *in vitro* biological replicates per group].

Figure S1

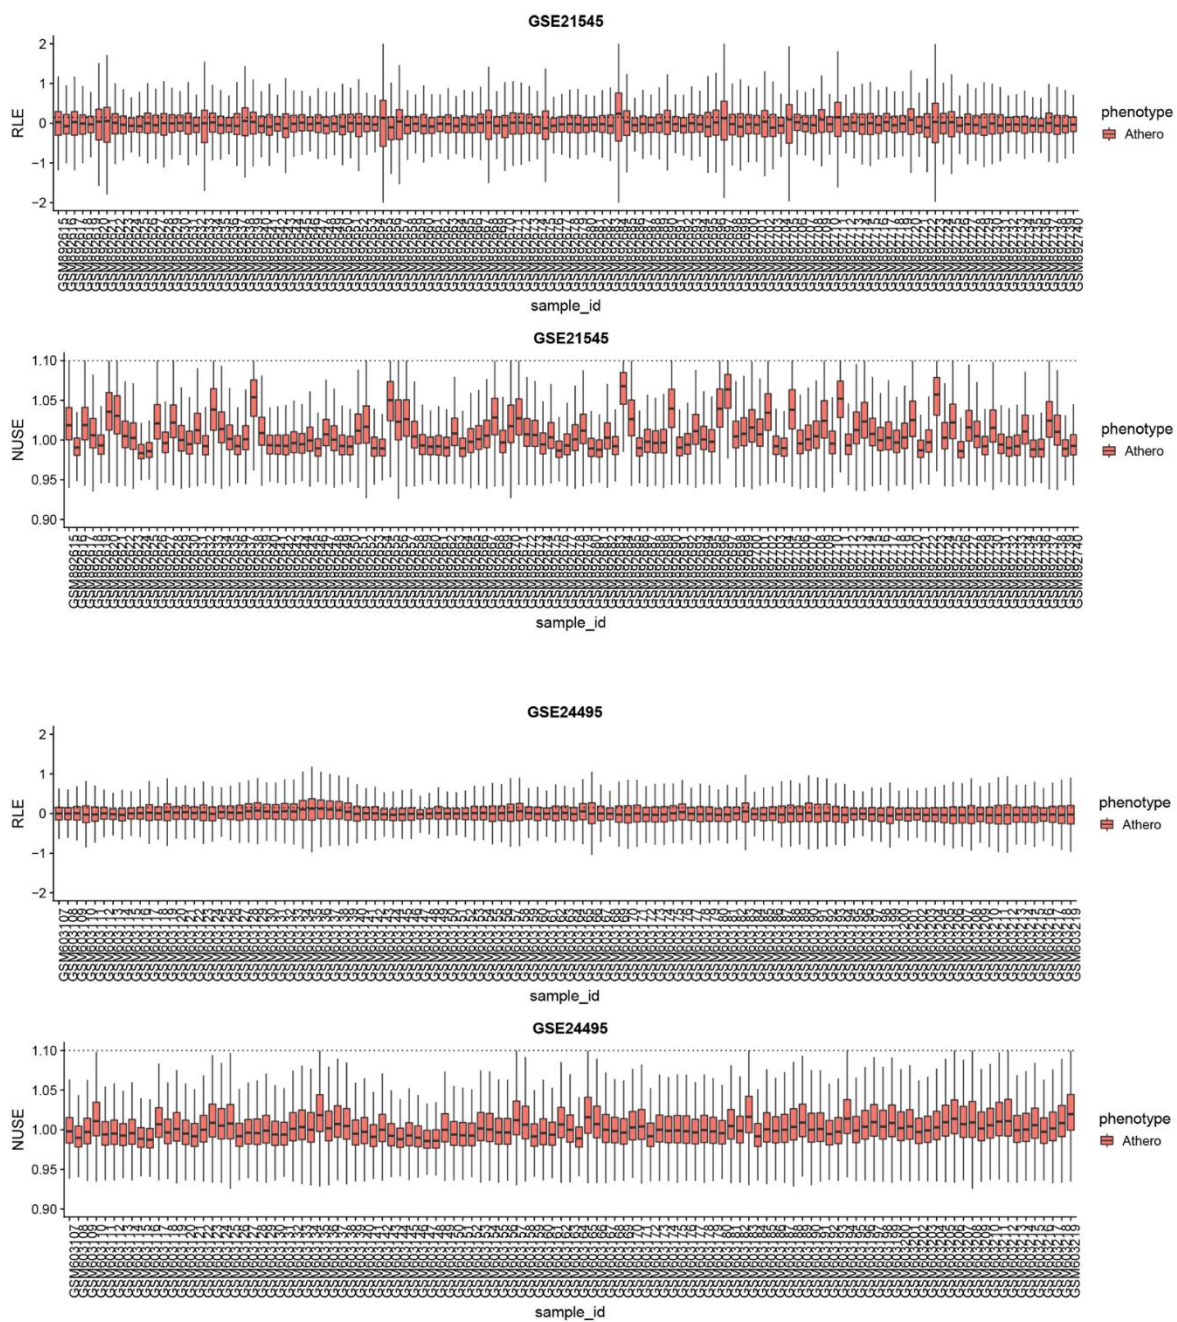

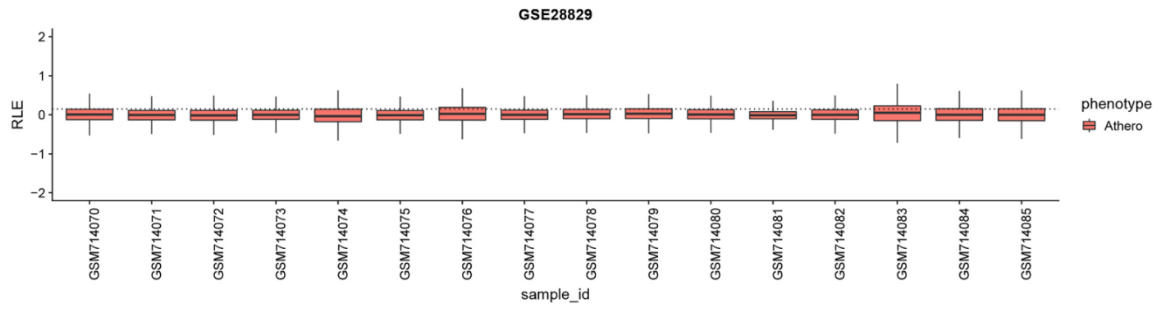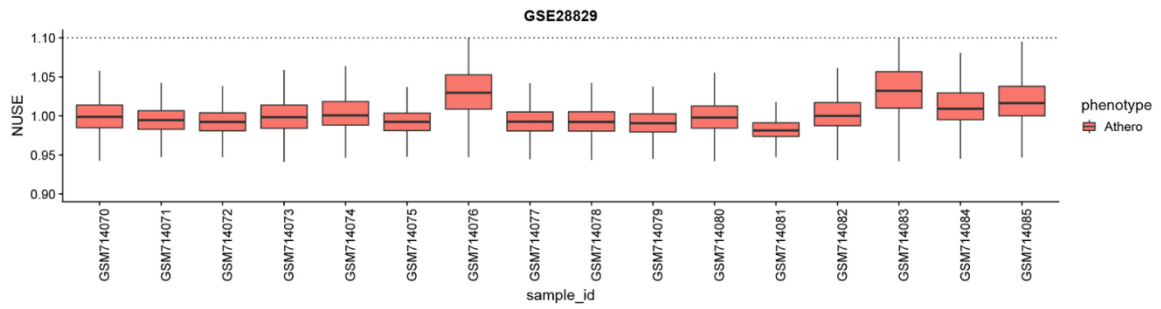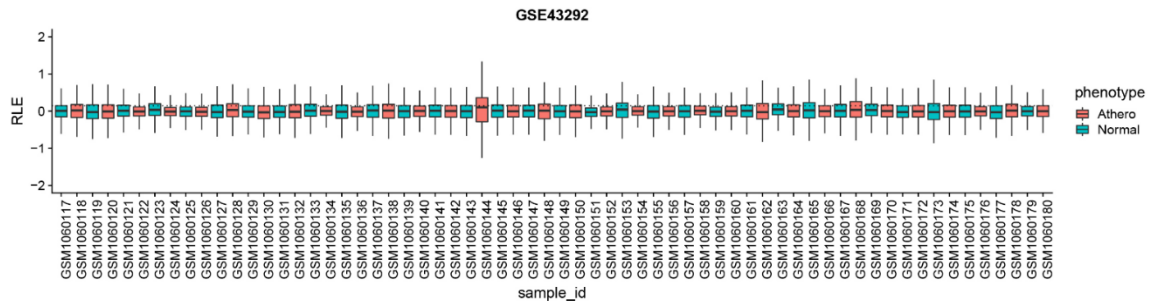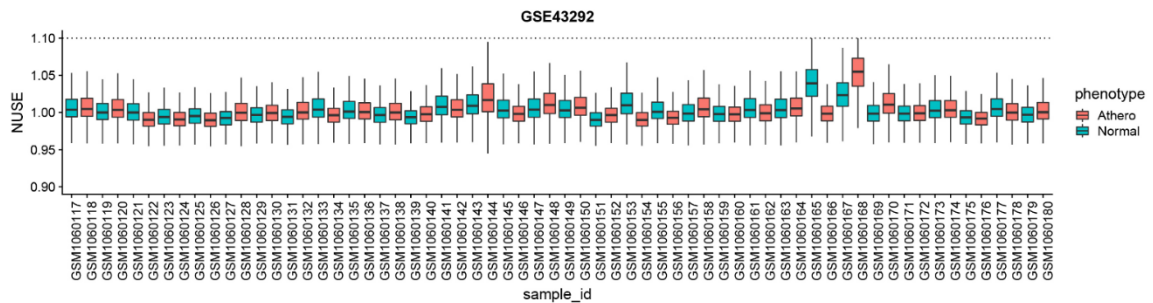



Figure S2

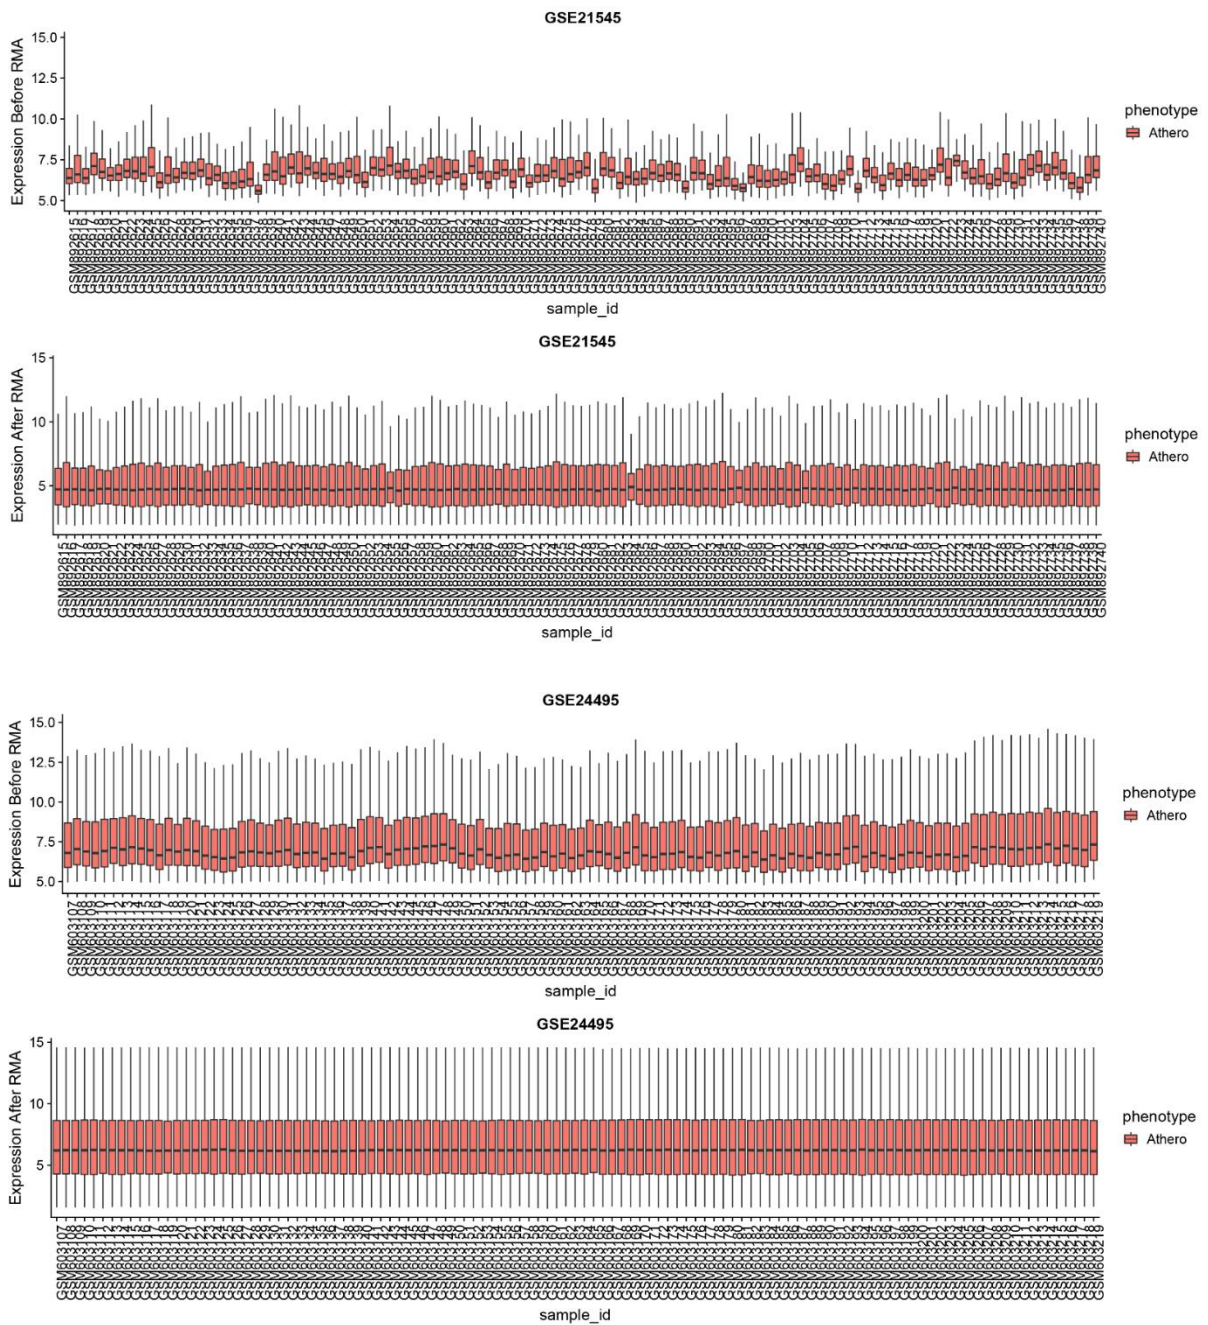

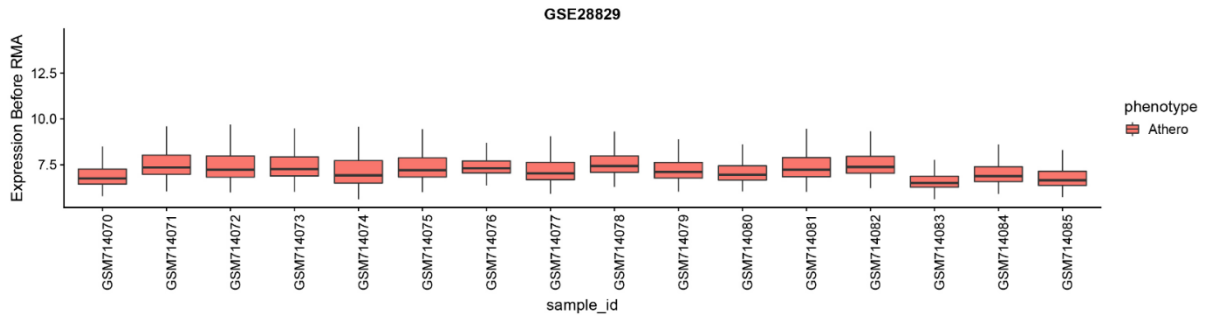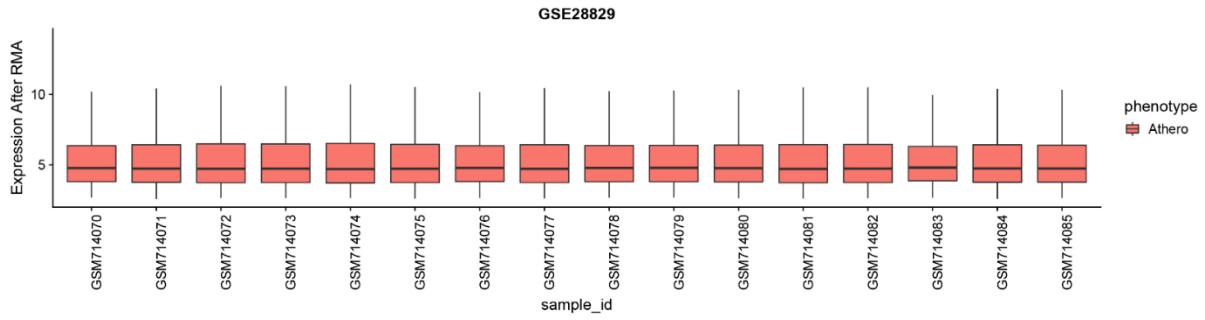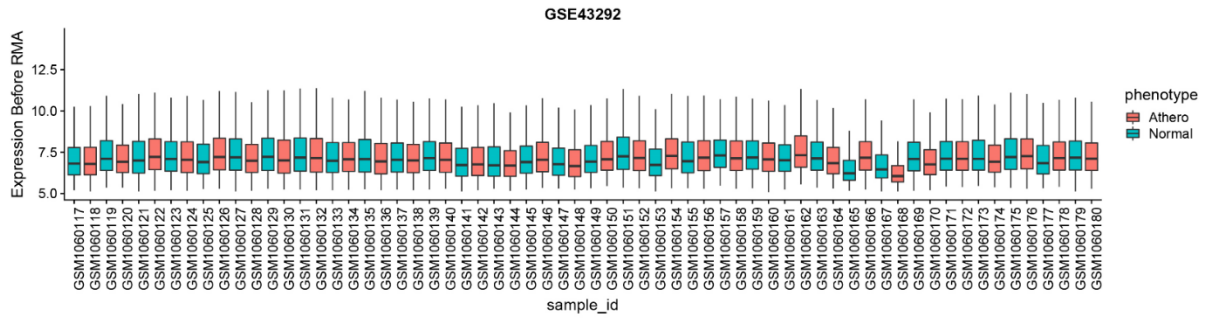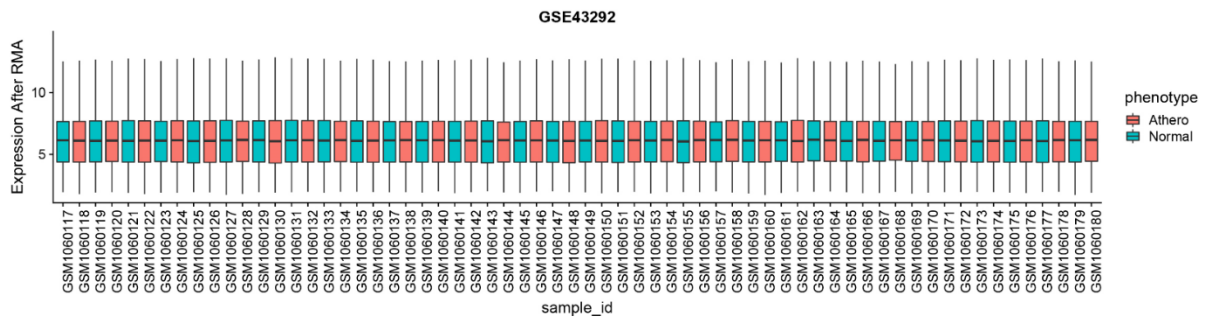

Figure S3

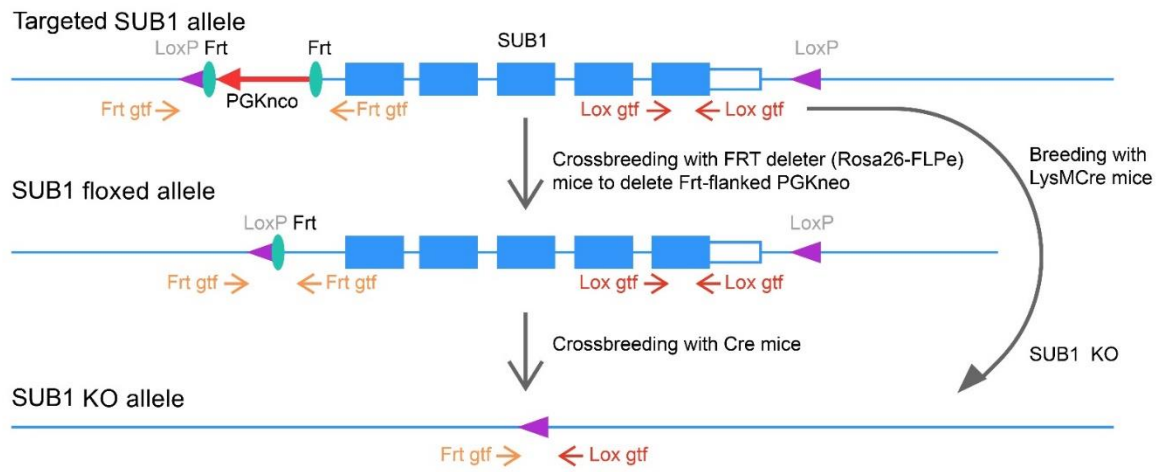

Figure S4

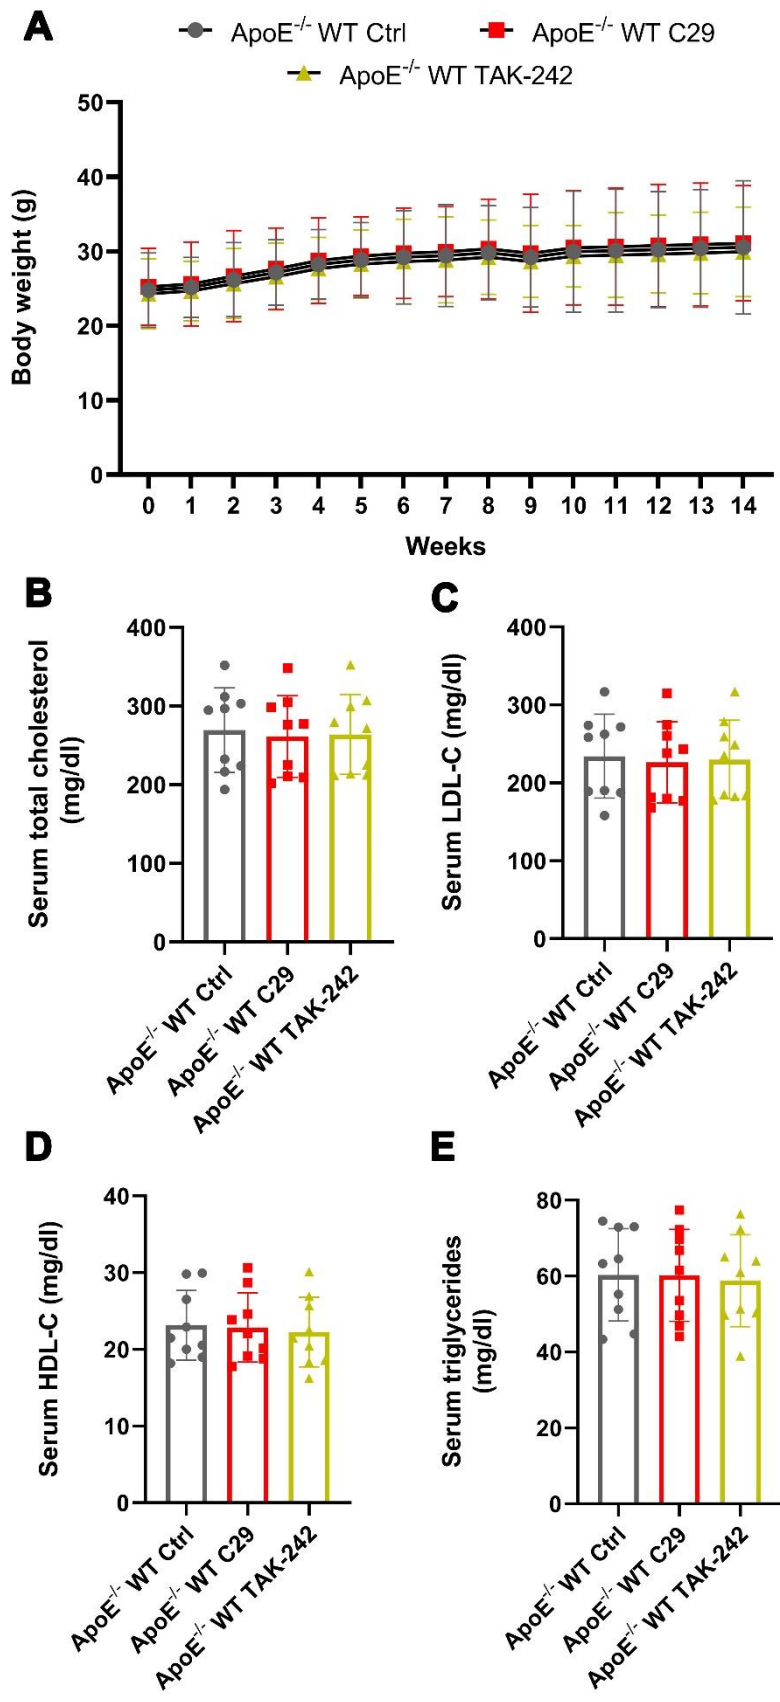

Figure S5

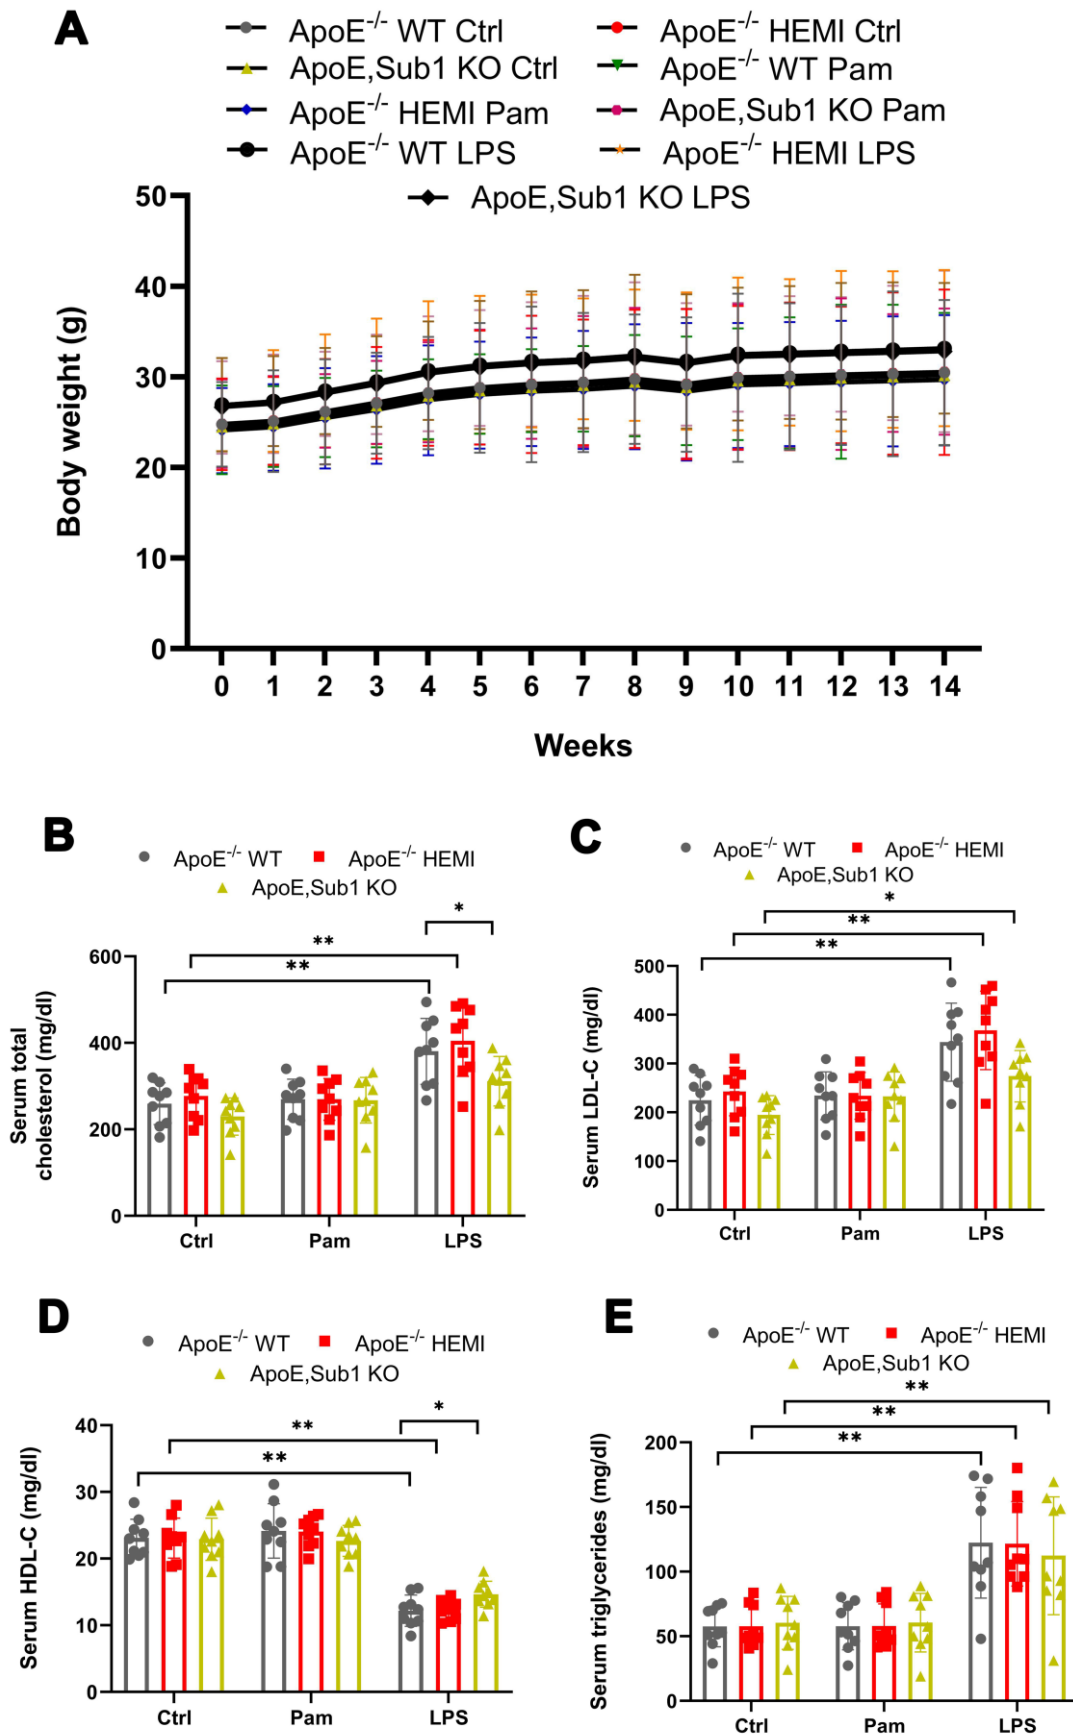

Figure S6

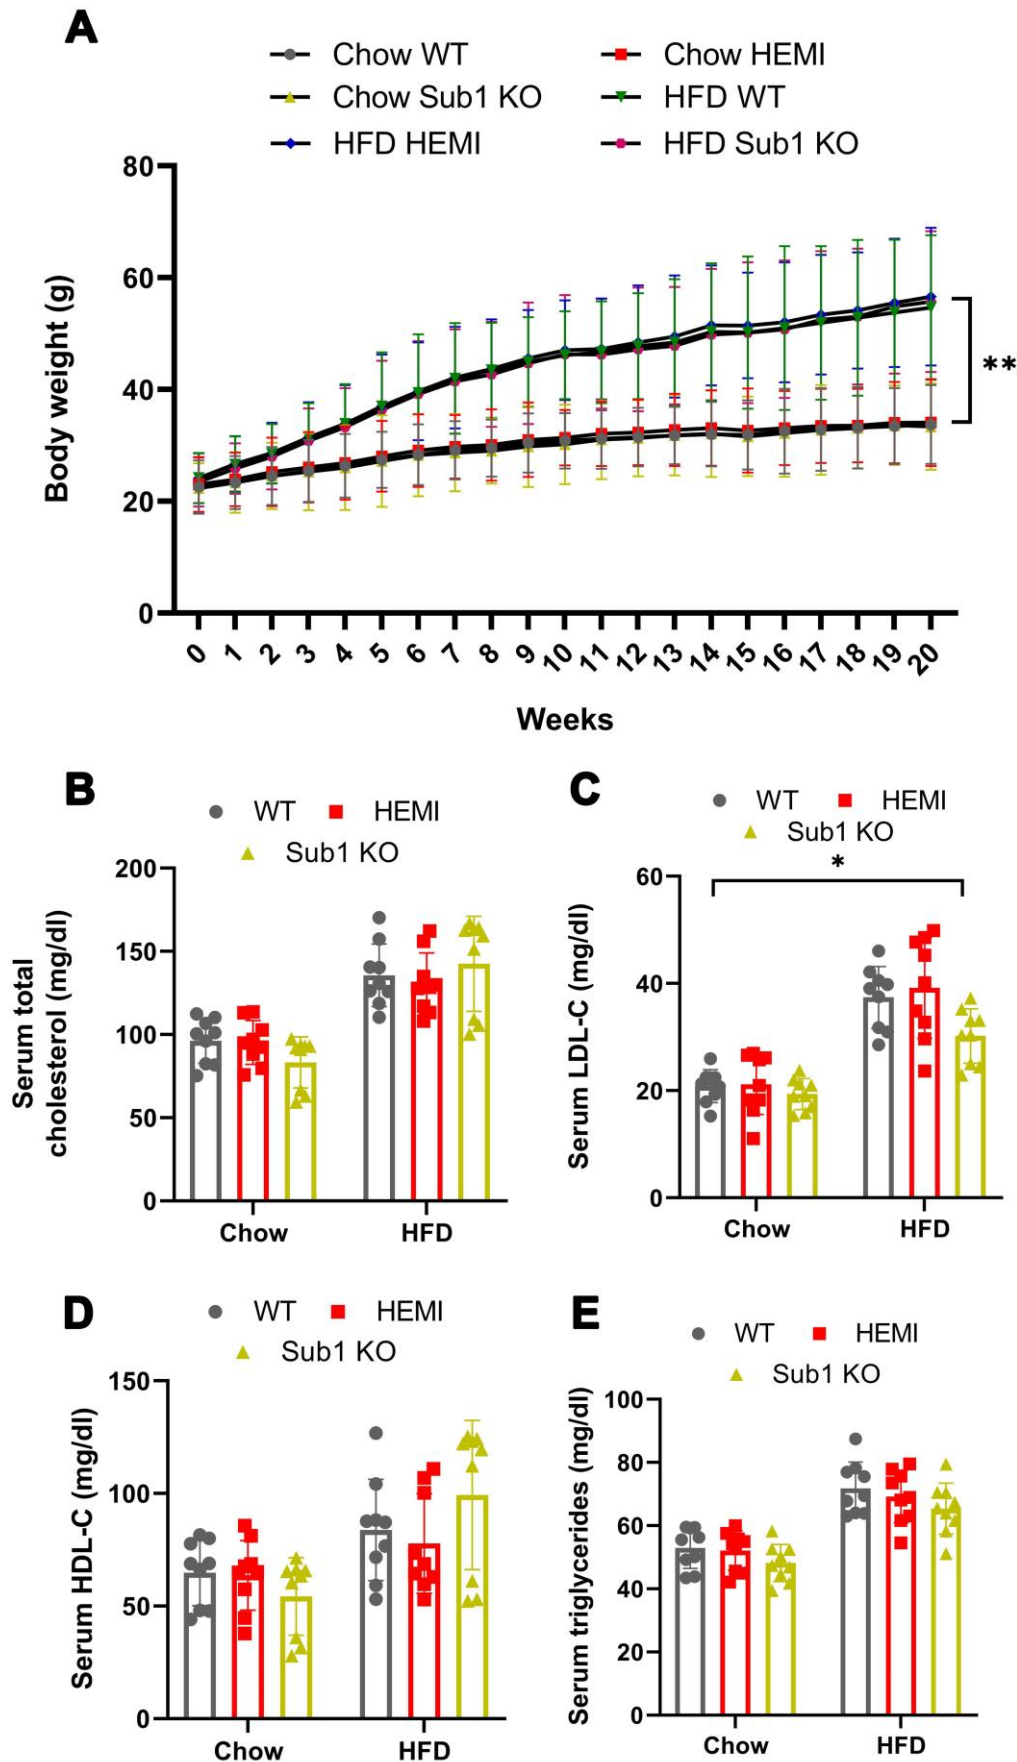

Figure S7

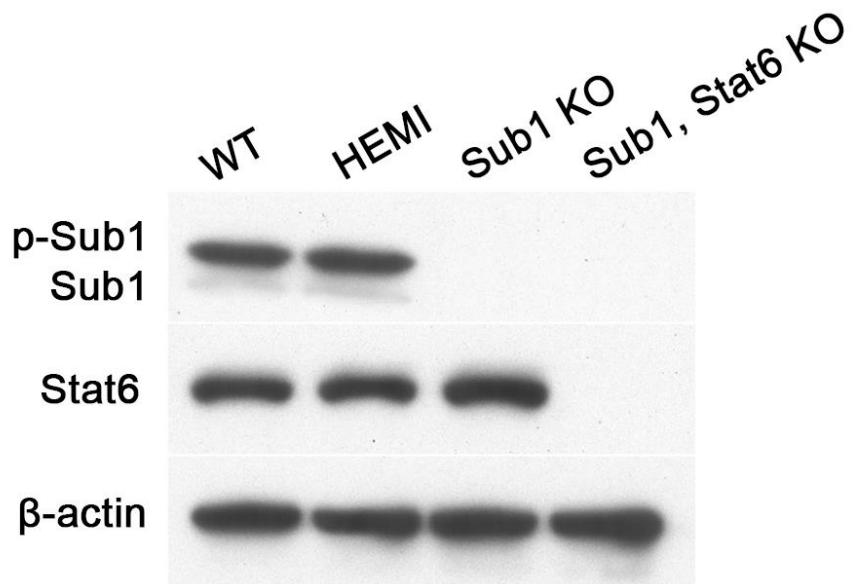

Figure S8

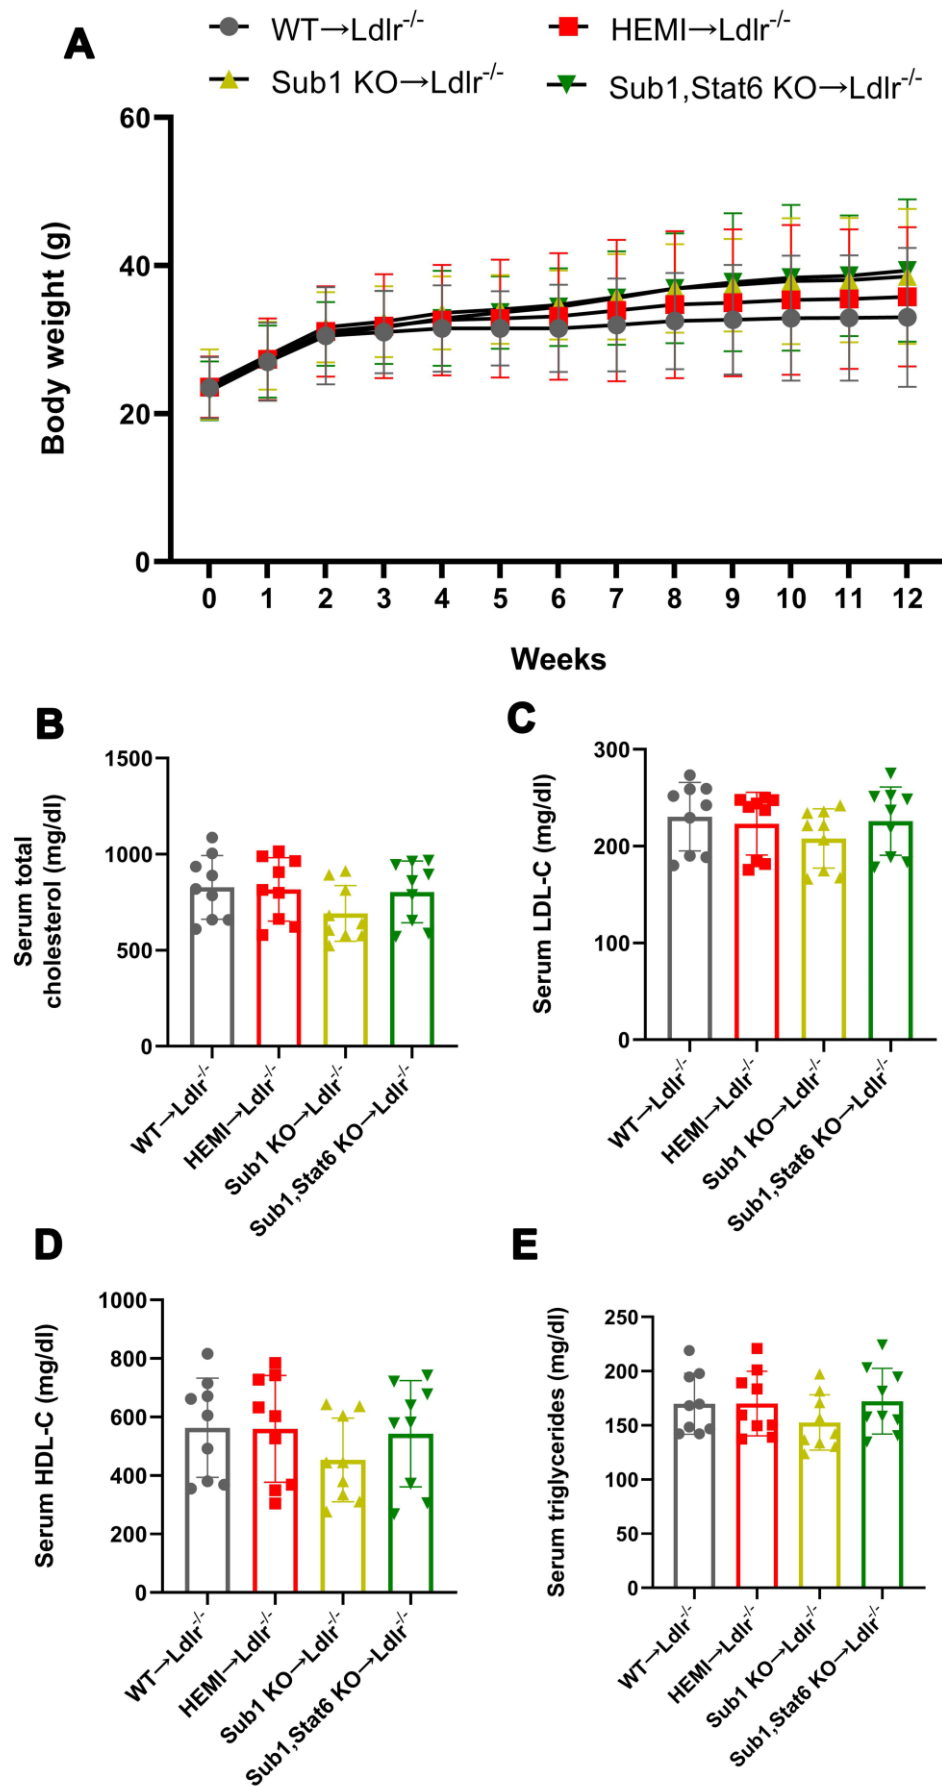



Figure S9

**A**

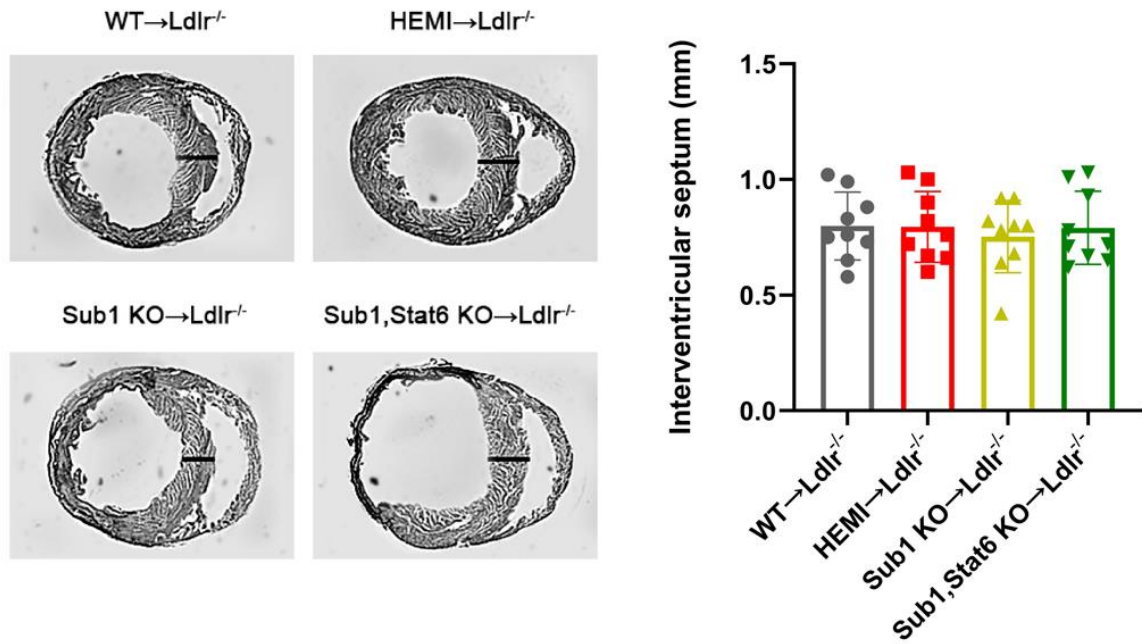

**B**

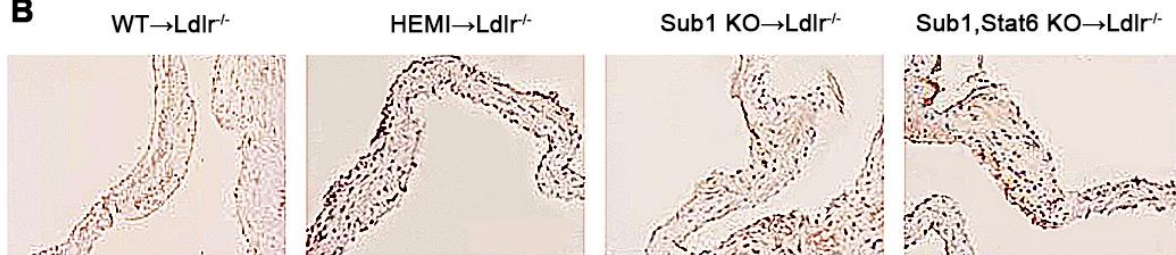

**C**

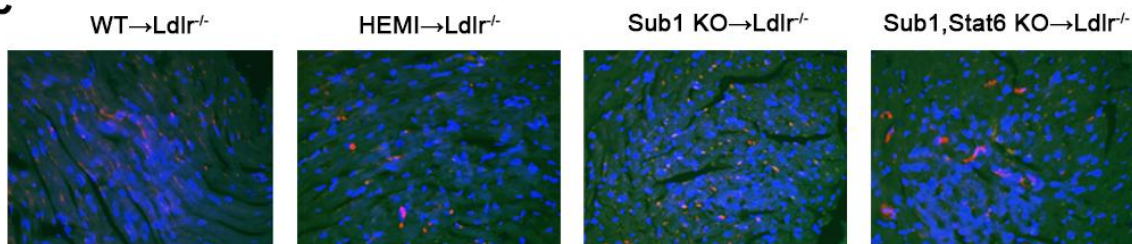

Figure S10

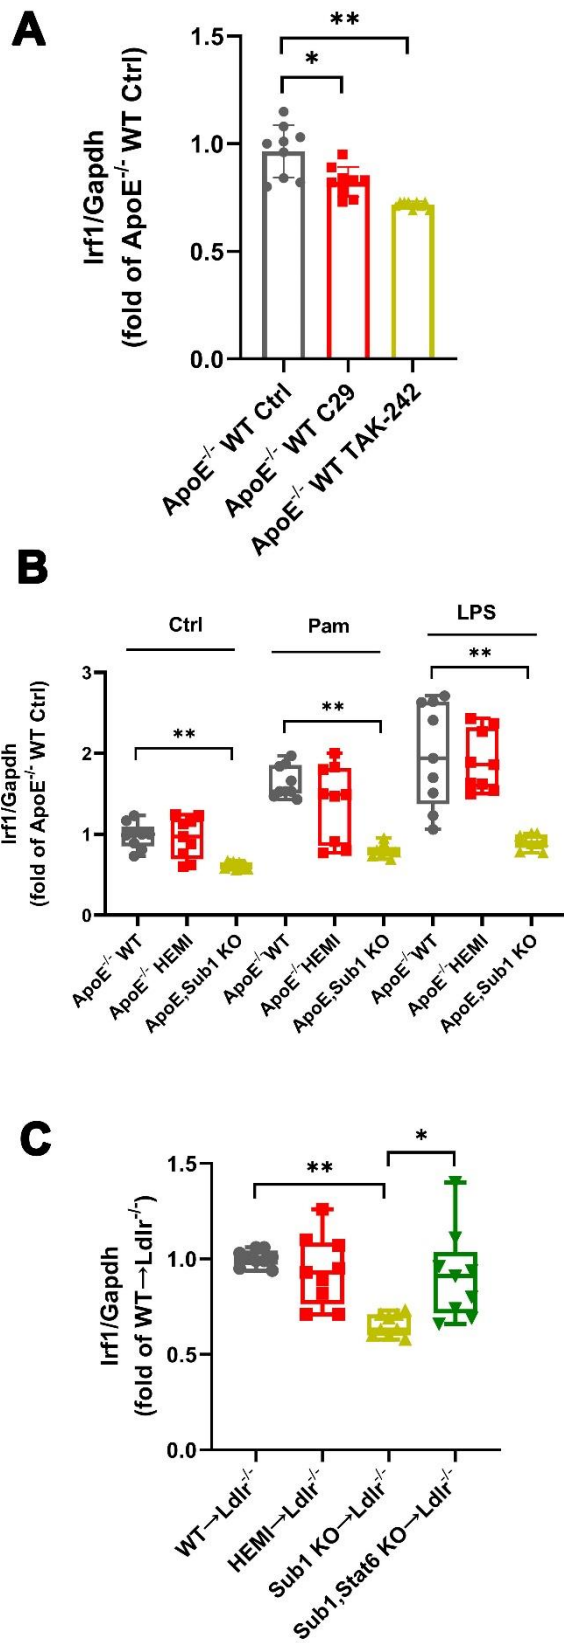

Figure S11

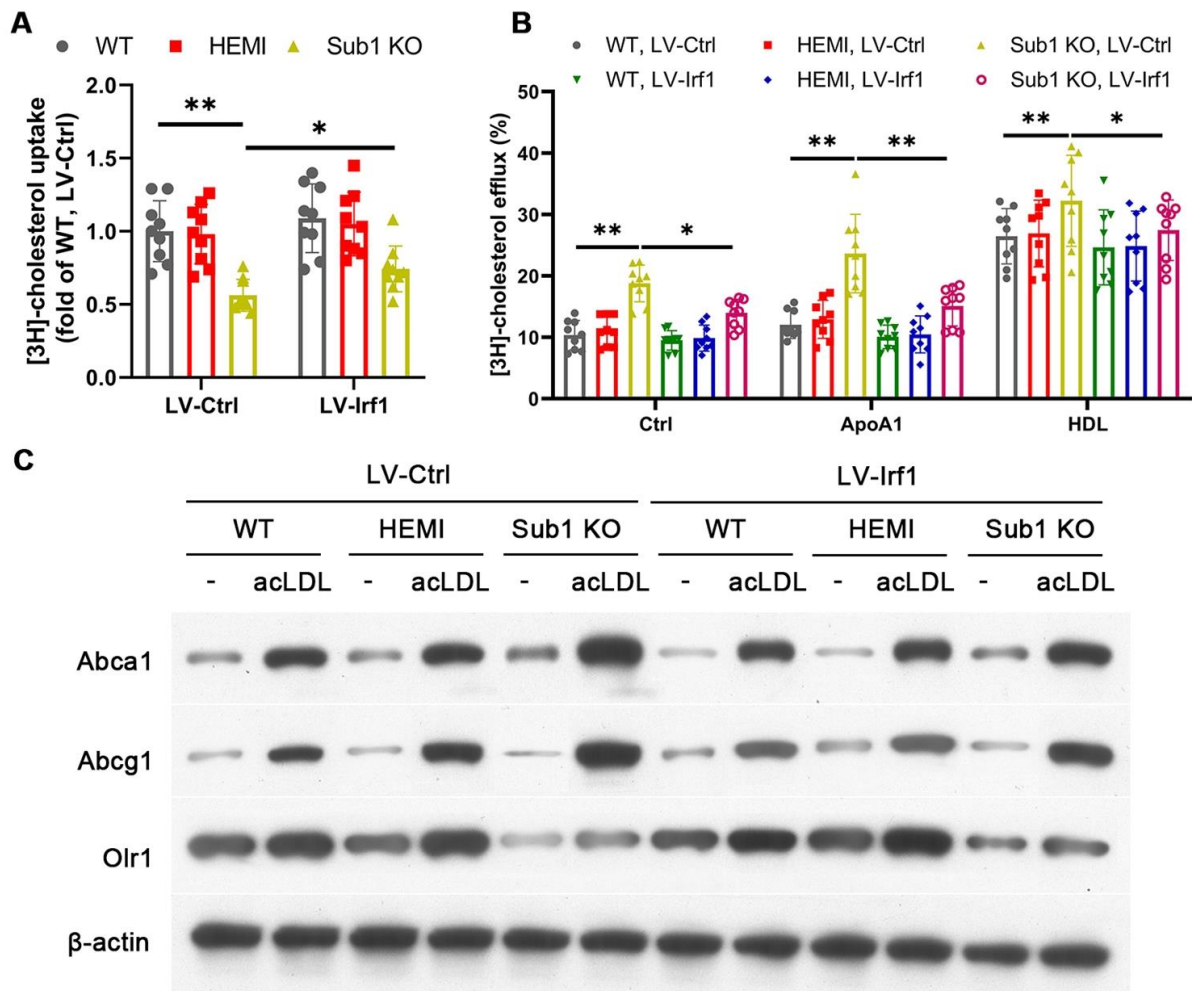

Supplement: ADVS-8-2004162-s001.pdf [file ADVS-8-2004162-s001.pdf]
